# Supplementary material for: Application of ChatGPT in Information Literacy Instructional Design
Source: MDPI journal article supplement (doi:10.3390/publications12020011), 2024-04-15
Supplement: s1 [file s1]

Article

# Application of ChatGPT in Information Literacy Instructional Design

Jelena Madunić <sup>1\*</sup> and Matija Sovulj <sup>2</sup>

<sup>1</sup> University of Split Library; jmadunic@svkst.hr

<sup>2</sup> University of Split Library; msovlj@svkst.hr

\* Author to whom correspondence should be addressed

## Step-by-step guide: Developing a custom chat model

For new users, preliminary requirement is signing up for an OpenAI account, and a GitHub account. The first step is accessing Flowise repository at GitHub, as shown in Figure B1. In this application, Flowise provides drag & drop UI needed to build the customized LLM flow.

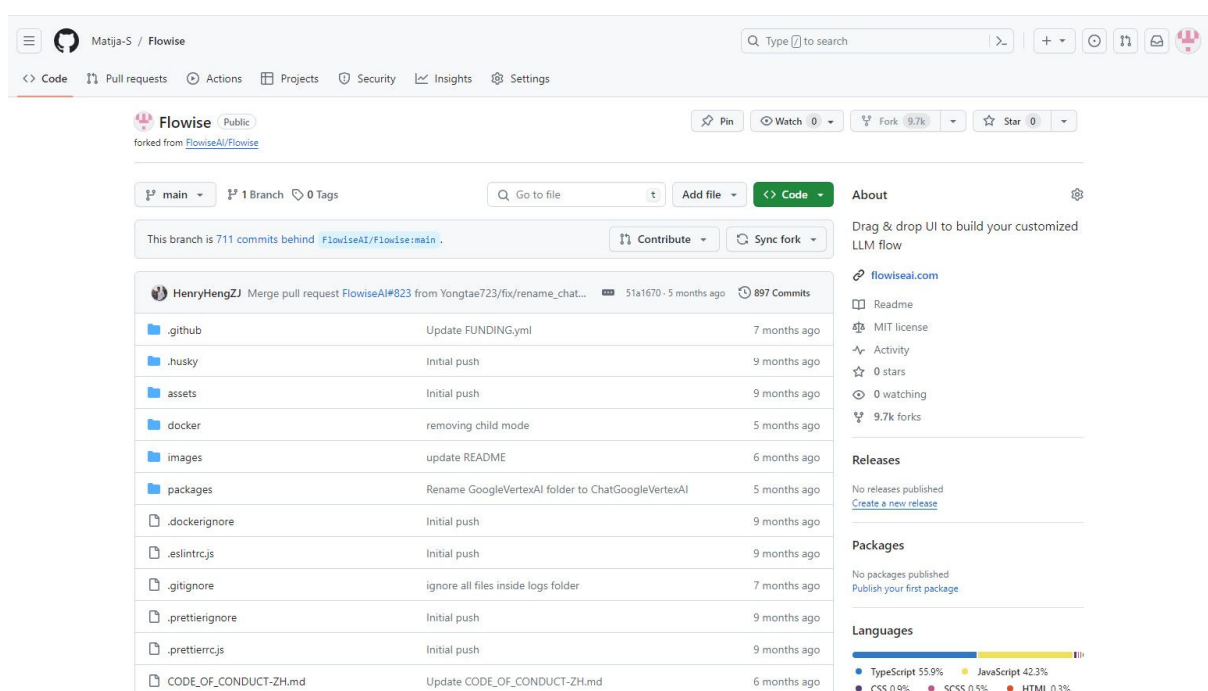

**Figure S1.** Flowise repository at GitHub.

The second step requires a server, i.e. location where the application will be uploaded. The service used for this application is Render. The Render dashboard provides options for two functions needed for our custom chatbot: connecting with GitHub and deployment of web service. Render dashboard is shown in Figure B2.

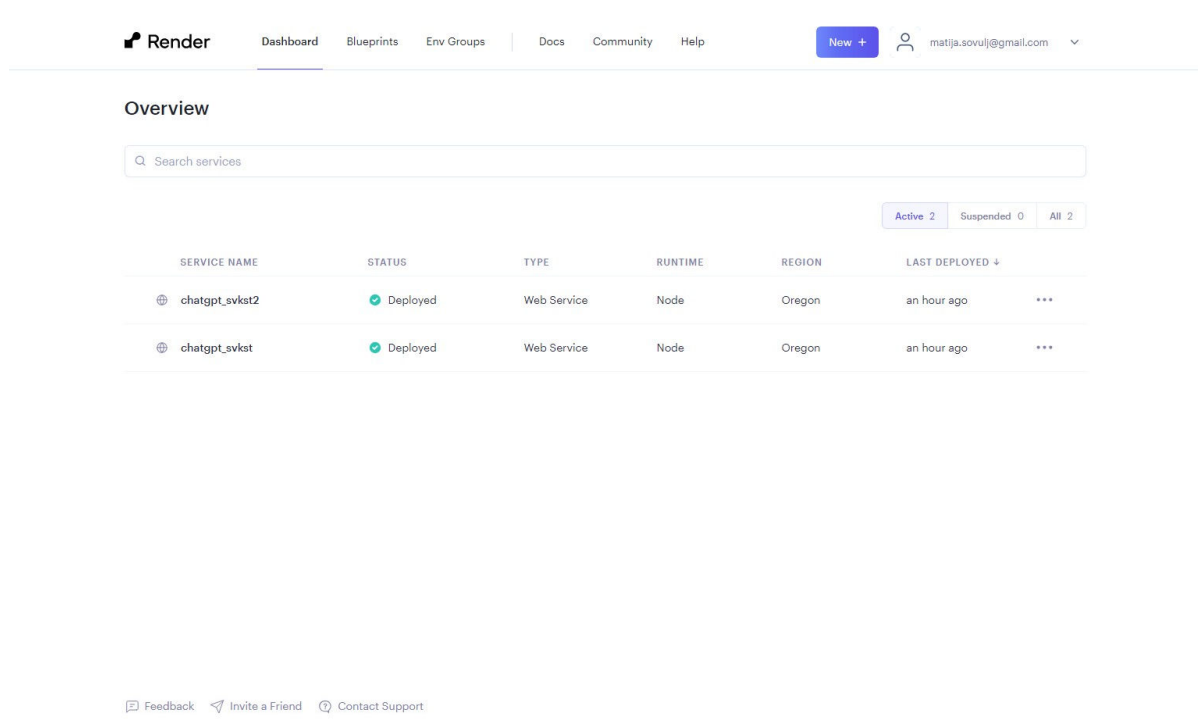

**Figure S2.** Render dashboard.

OpenAI API keys allow developers to access OpenAI's models through the API and build applications that can generate text, images, and code. To get an OpenAI API key, developers need to sign up for an OpenAI account and request an API key from the OpenAI dashboard. In our case, the OpenAI API key will be needed in the next steps, in the process of creating credentials for Flowise.

Pinecone vector database is needed to upload the .pdf documents which represent our custom dataset. First, an index is created on Pinecone dashboard, as shown in Figure B3. Pinecone uses the term 'index' as equivalent to repository. Before the upload process, it is necessary to create API key on Pinecone as well, to be used for Flowise.

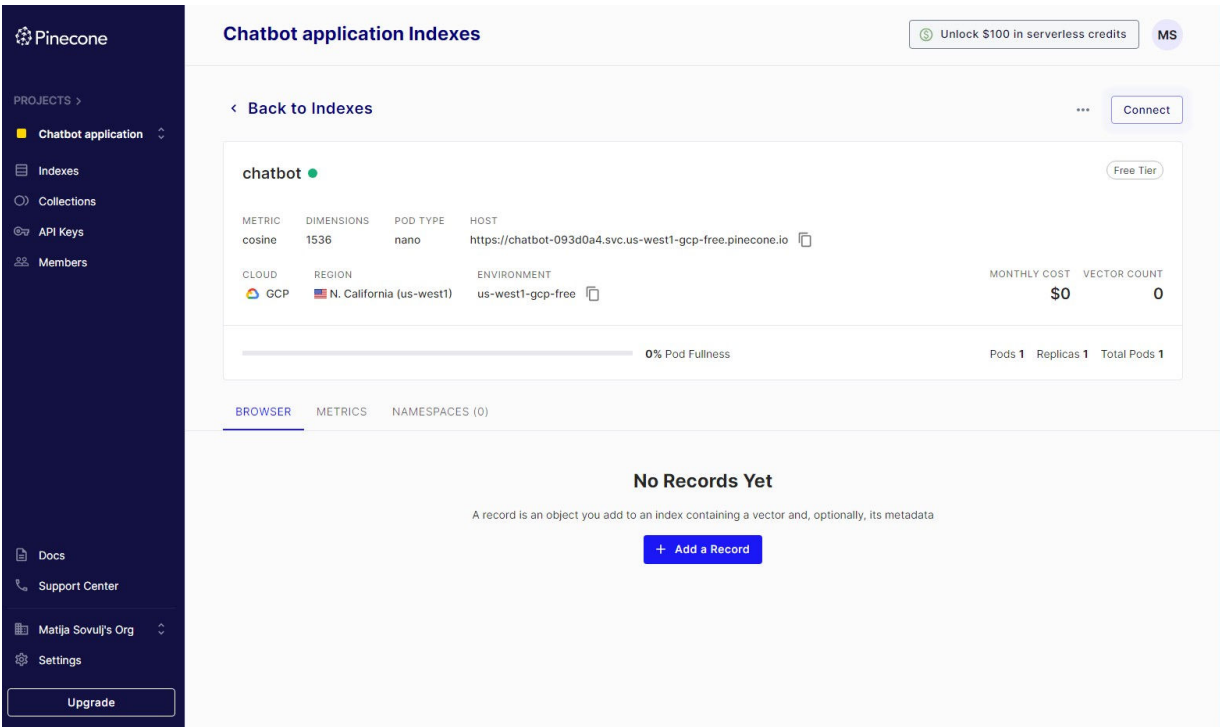

Figure S3. Pinecone vector database.

On the FlowiseAI dashboard, credentials are created for both OpenAI and Pinecone, as shown in Figure B4. In this step, OpenAI and Pinecone API keys are used.

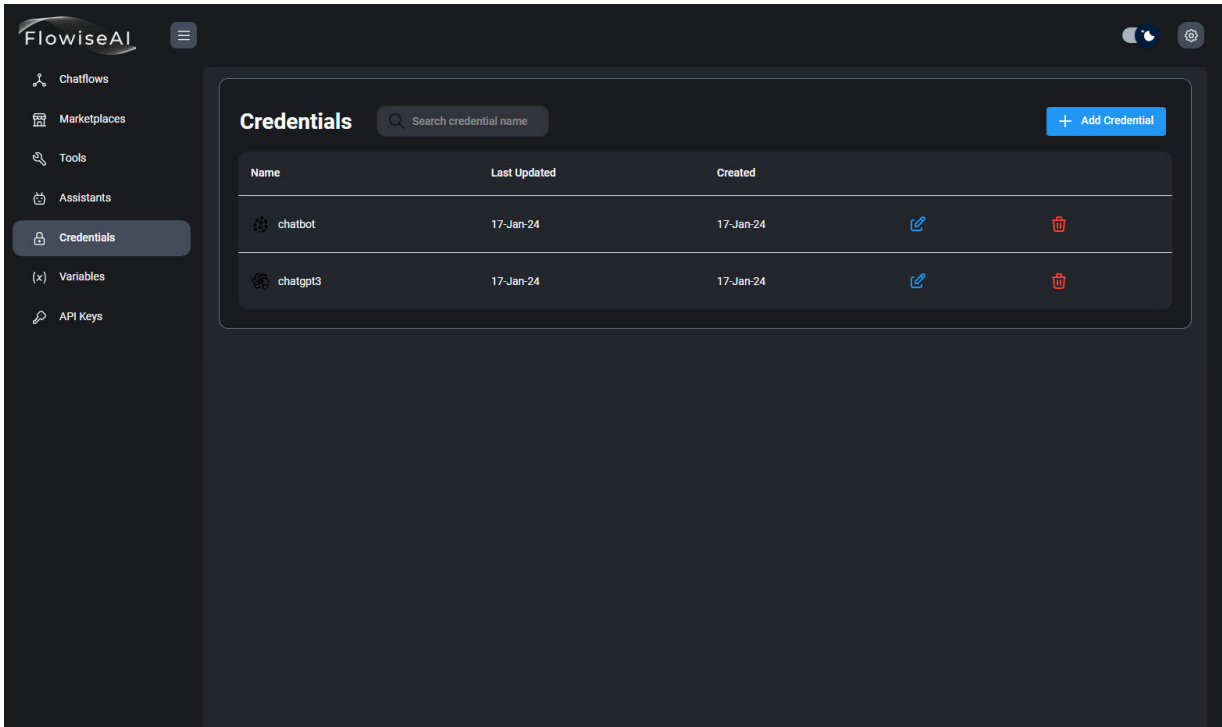

Figure S4. Flowise credentials.

The next step is choosing a pre-defined template from the Flowise Marketplace, shown in

Figure B5. The template used for our application is Conversational Retrieval QA Chain. This template is based on a method which combines retrieving the most relevant portions of text

from the documents, in combination with chat history. Flowise templates can be edited and adapted for specific purposes.

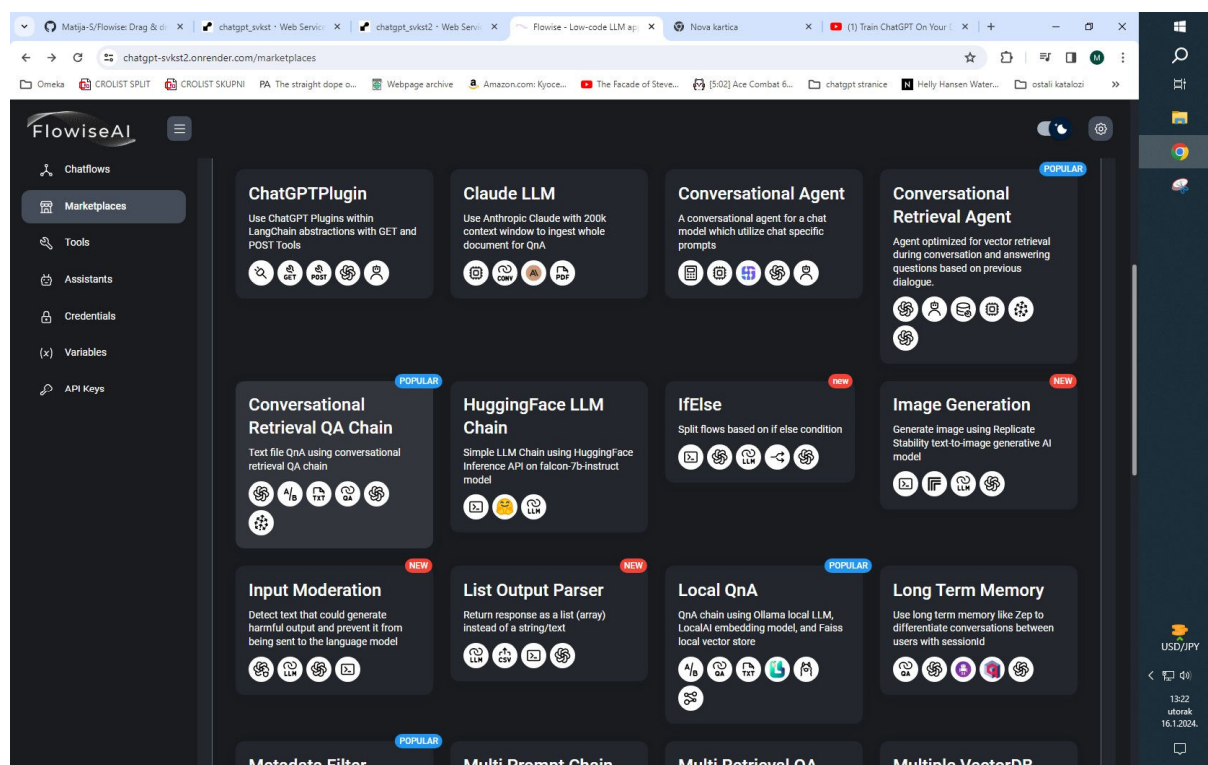

Figure S5. Flowise Marketplace.

In the next step, on the Conversational Retrieval QA Chain template shown in Figure B6, document loader node is added, necessary for uploading the source documents which represent our modified dataset. By selecting Upload File section on that node, documents are added to Pinecone server. For the purpose of testing this custom template, we chose a repository of required and supplementary course materials listed for the course “Academic Writing” (also used in the initial part of the research), in the format of .pdf files.

Selecting the Connect Credentials button on the OpenAI Embeddings node automatically connects the previously defined credentials for OpenAI and Pinecone.

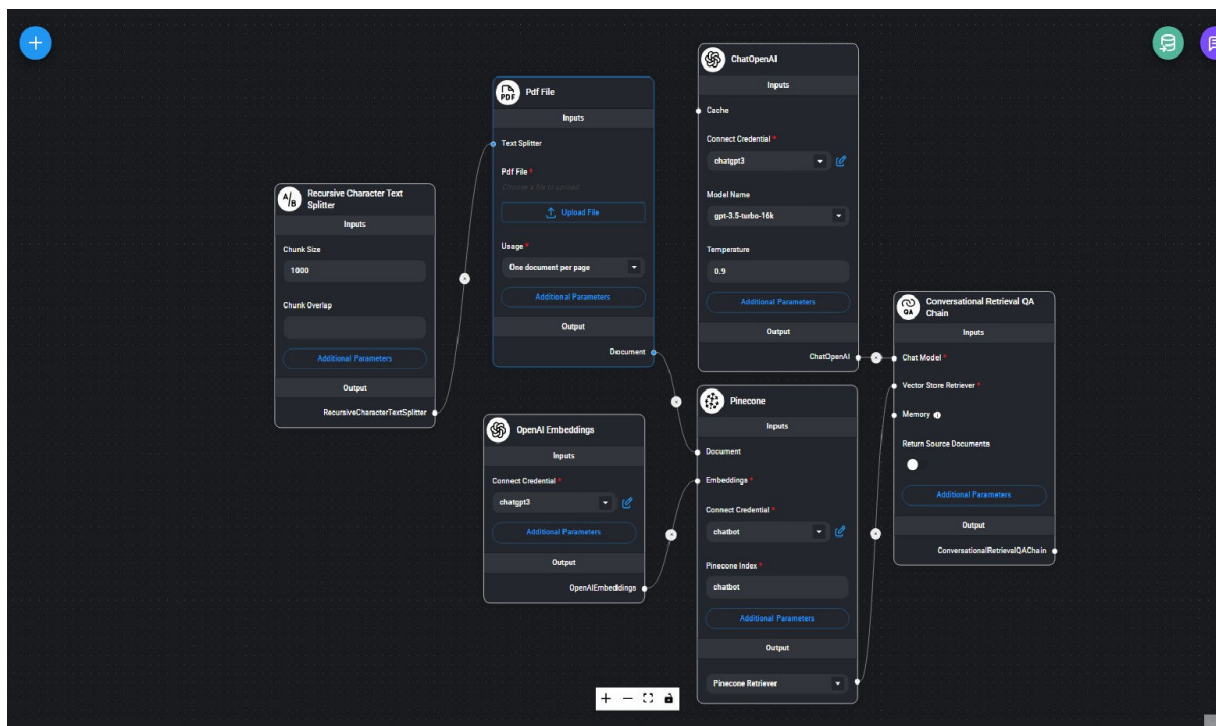

**Figure S6.** Modified version of the Conversational Retrieval QA Chain template.

In the final version of the modified template, unnecessary nodes can be removed, to give a clearer view of the elements. To summarise, the basic elements of the final version are Pinecone server from which documents are retrieved, Open AI model and QA Chain which allows for communication via chatbot interface.
